# Supplementary material for: Divergent Allele Advantage at Human MHC Genes: Signatures of Past and Ongoing Selection
Source: PubMed Central journal article supplement — Mol Biol Evol. 2018 Jun 8;35(9):2145–58. doi: 10.1093/molbev/msy116 (PMC6106954; doi:10.1093/molbev/msy116), 2018-06-08
Supplement: msy116_supp.pdf [file msy116_supp.pdf]

## **Supplementary Material for**

### **Divergent allele advantage at human MHC genes: signatures of past and ongoing selection**

Federica Pierini <sup>1</sup> & Tobias L. Lenz <sup>1,\*</sup>

\* Corresponding author: Tobias L. Lenz, [lenz@post.harvard.edu](mailto:lenz@post.harvard.edu)

**Supplementary material includes:**

**Supplementary Figures S1-S11**

**Supplementary Tables S1-S9**

**Supplementary figure S1.** Proportion of unique peptides (out of a total of 118,097 pathogen-derived peptides) predicted to be bound by at least one allele is shown for each locus.

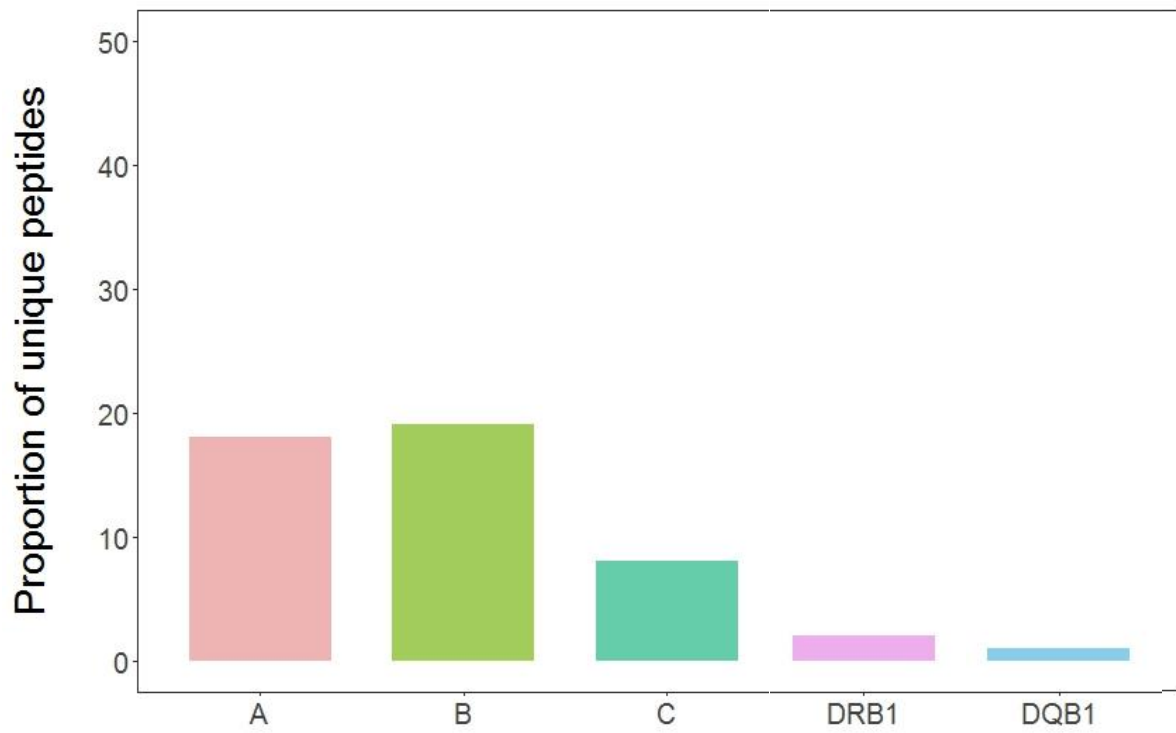

**Supplementary figure S2.** Percentage of common (light colours) and private (dark colours) peptides predicted to be bound by each allele at the different MHC loci.

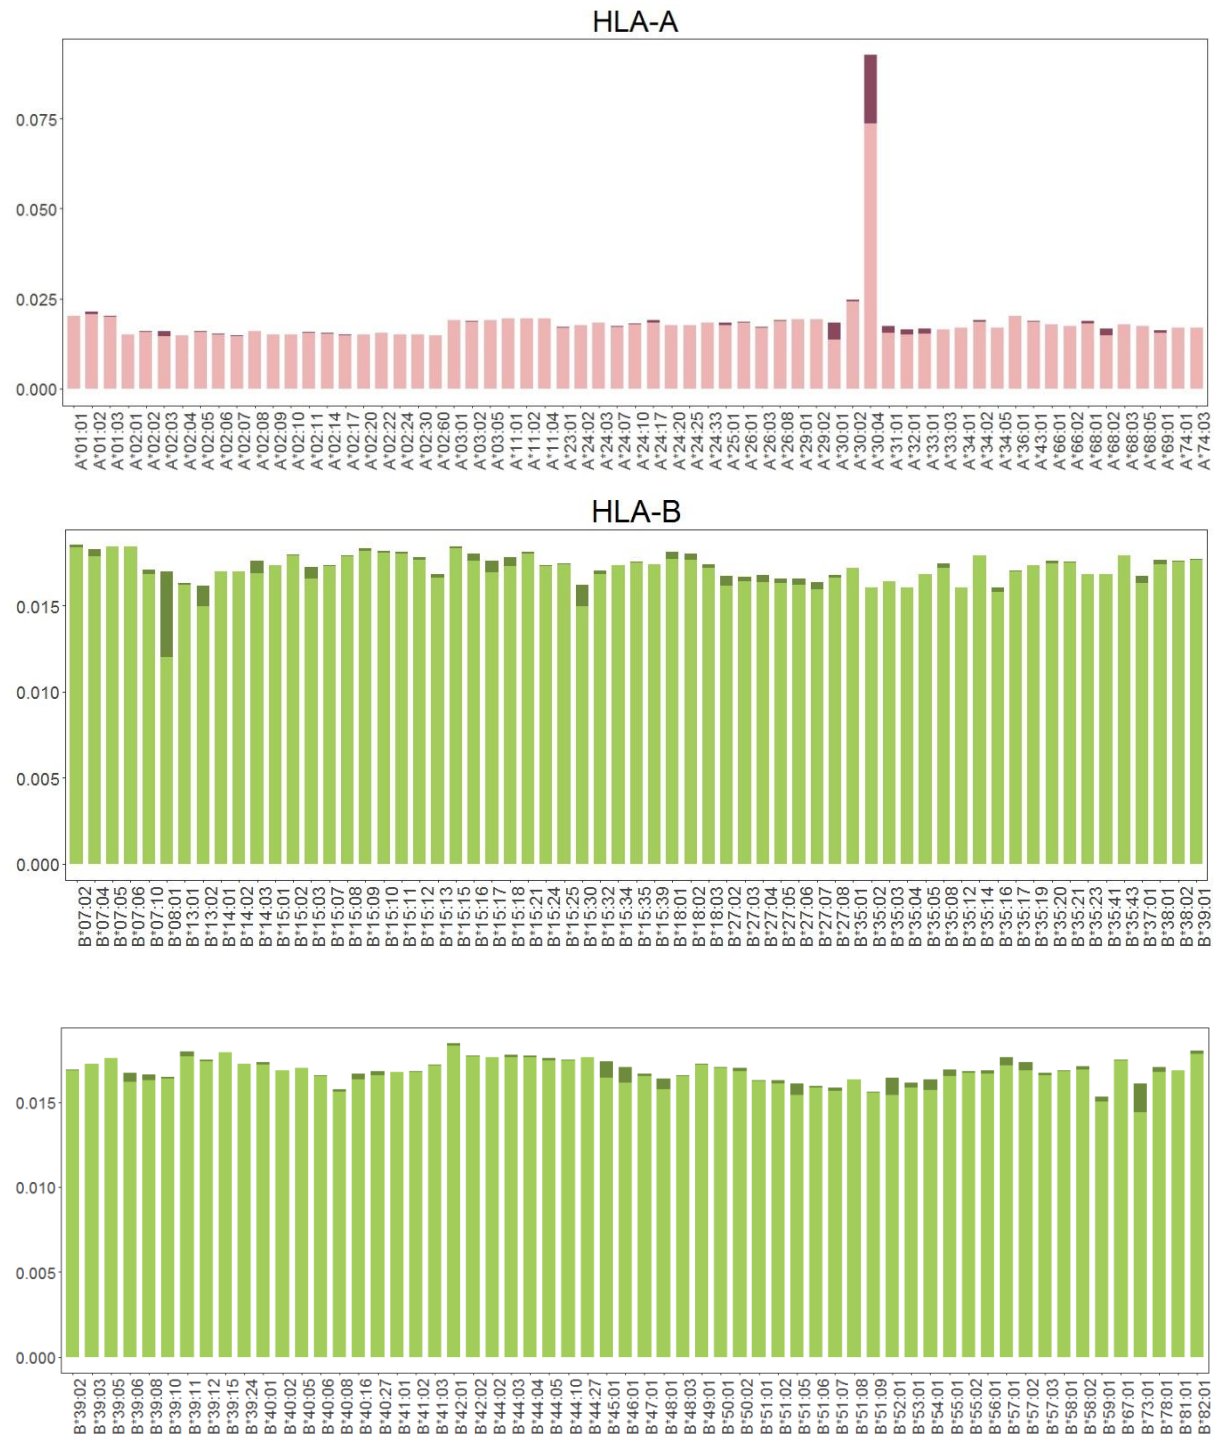

### HLA-C

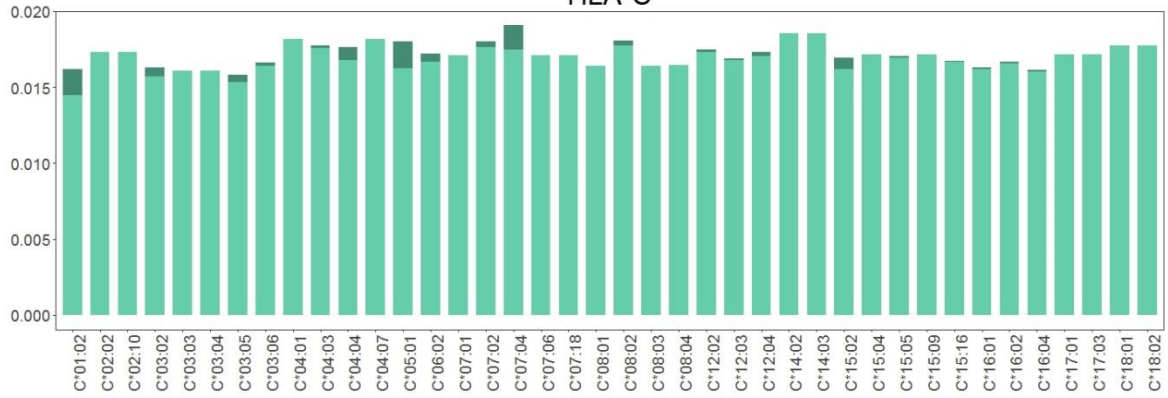

### HLA-DR

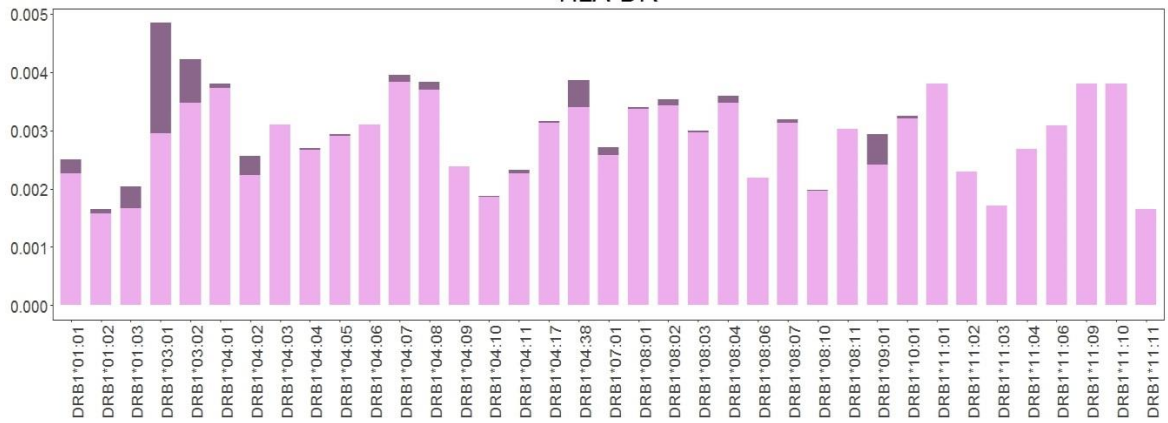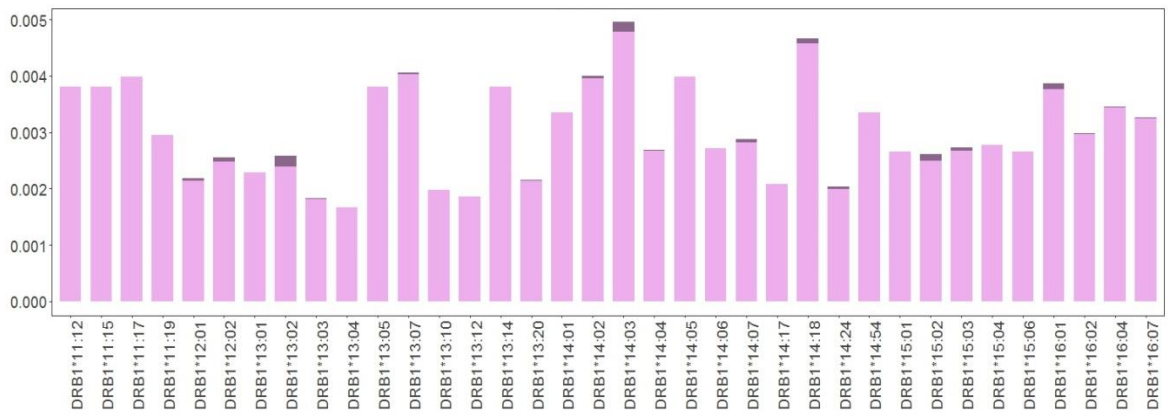

### HLA-DQ

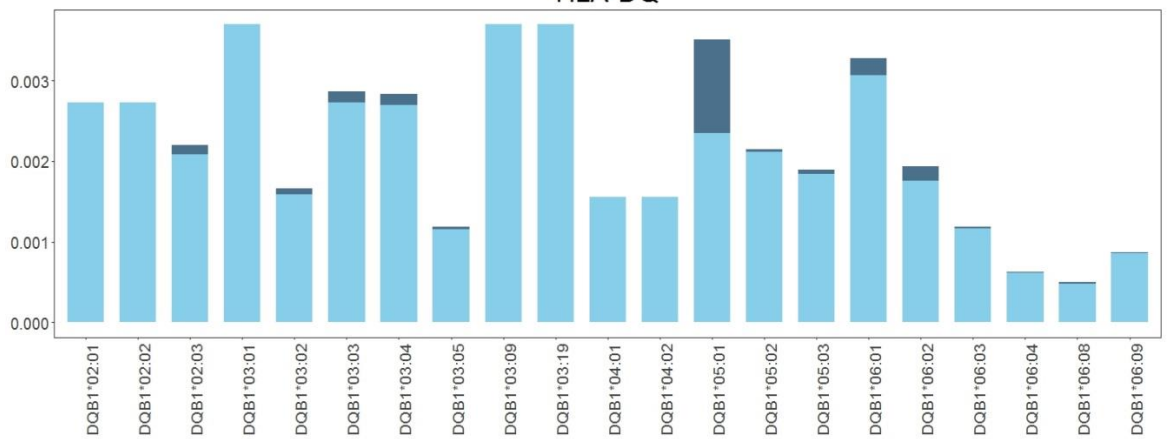

**Supplementary figure S3. Overlap in bound peptides between different loci for alleles at class I ( $A \cap B \cap C$ ) and class II ( $DQB1 \cap DRB1$ ) genes.** Number of common alleles tested at the different HLA loci: HLA-A: 63, HLA-B: 123, HLA-C: 40, HLA-DRB1: 73, HLA-DQB1: 21. Binding prediction analyses performed on the complete dataset of pathogen proteins (n=232) for a total of 118,097 unique pathogen-derived peptides. Bound peptides represent the total number of unique peptides bound by at least one allele at each locus.

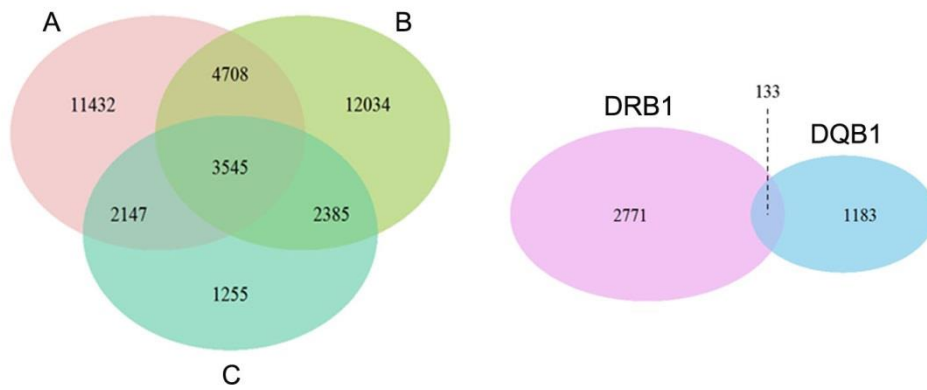

**Supplementary figure S4.** Overlap in bound peptides between class I and class II genes ( $A \cap DRB1$ ,  $A \cap DQB1$ ,  $B \cap DRB1$ ,  $B \cap DQB1$ ,  $C \cap DRB1$ ,  $C \cap DQB1$ ).

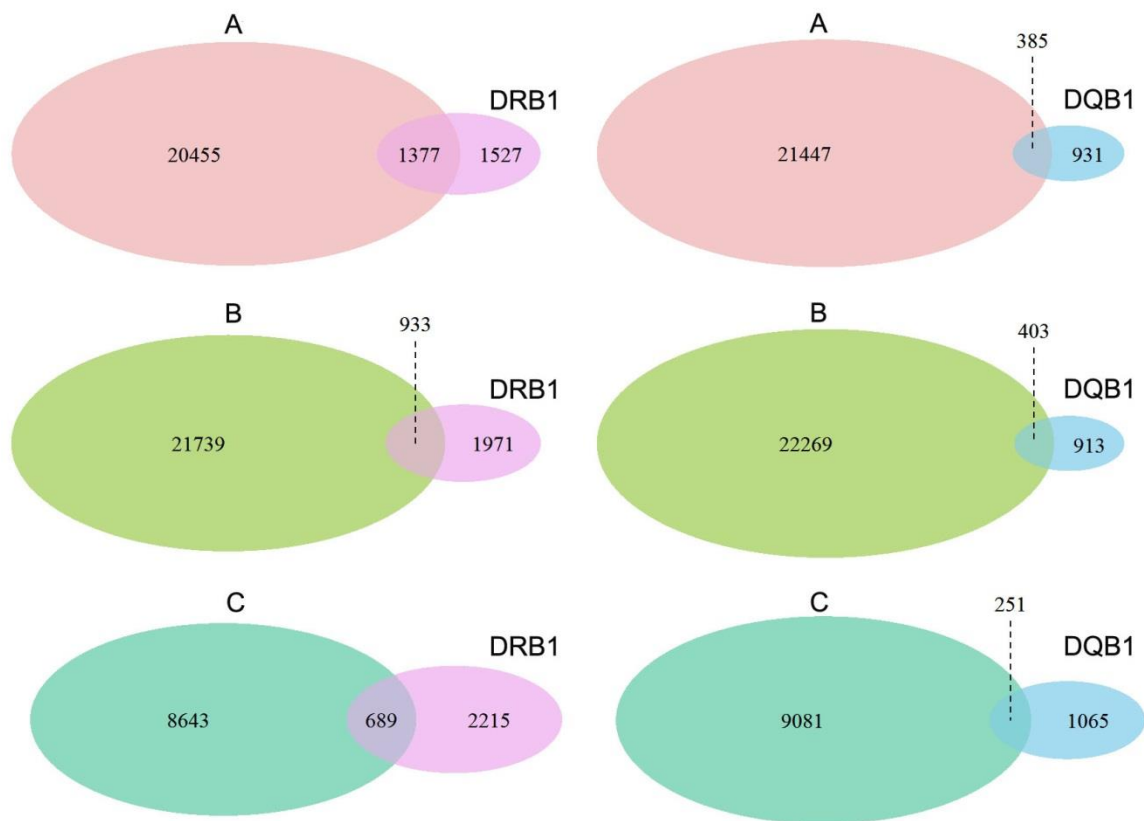

**Supplementary figure S5. (a)** Median number of peptides bound by allele pairs and **(b)** median genetic distances between allele pairs at each locus. Comparison of groups was done using the Kruskal-Wallis test followed by multiple comparison tests for pairwise differences. Different letters indicate statistically significant differences between loci ( $p < 0.001$ ).

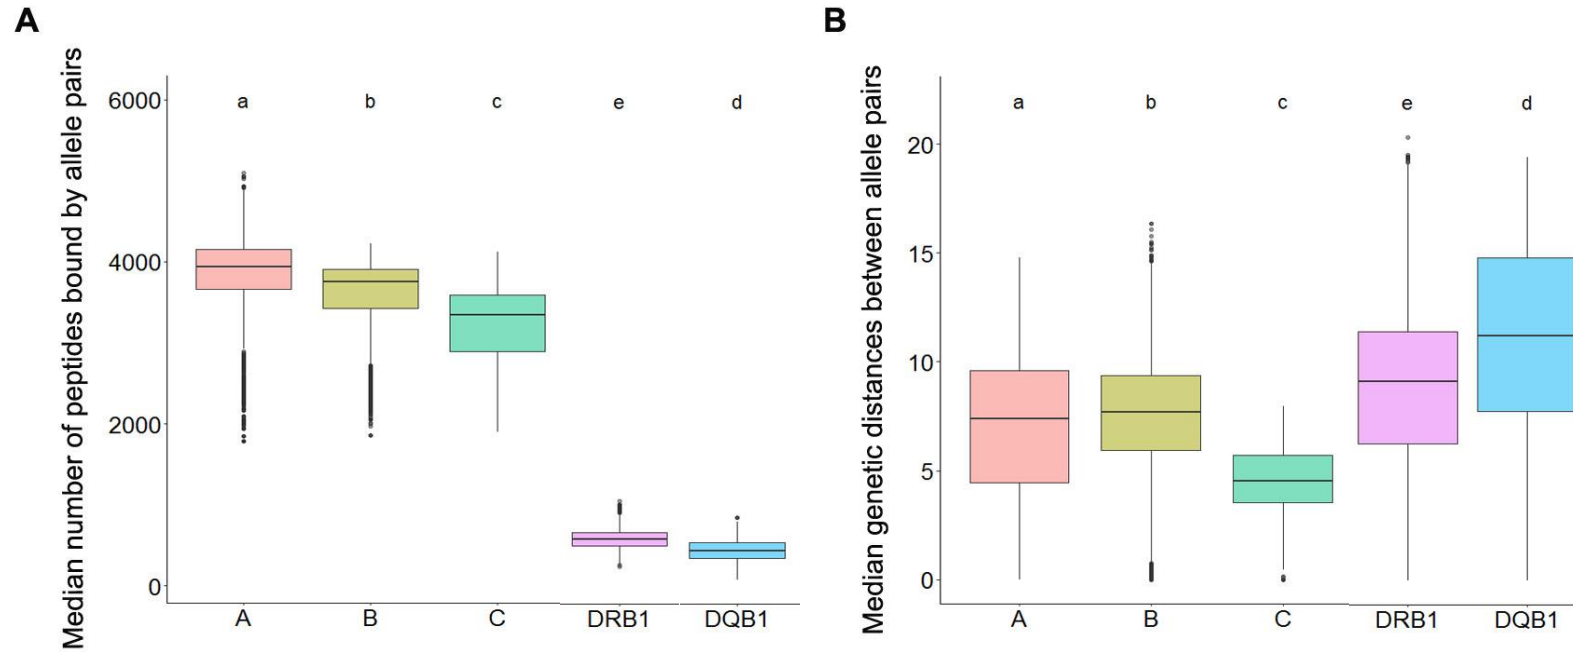

**Supplementary figure S6.** Correlation between pairwise parameters of allele divergence for HLA-B locus.

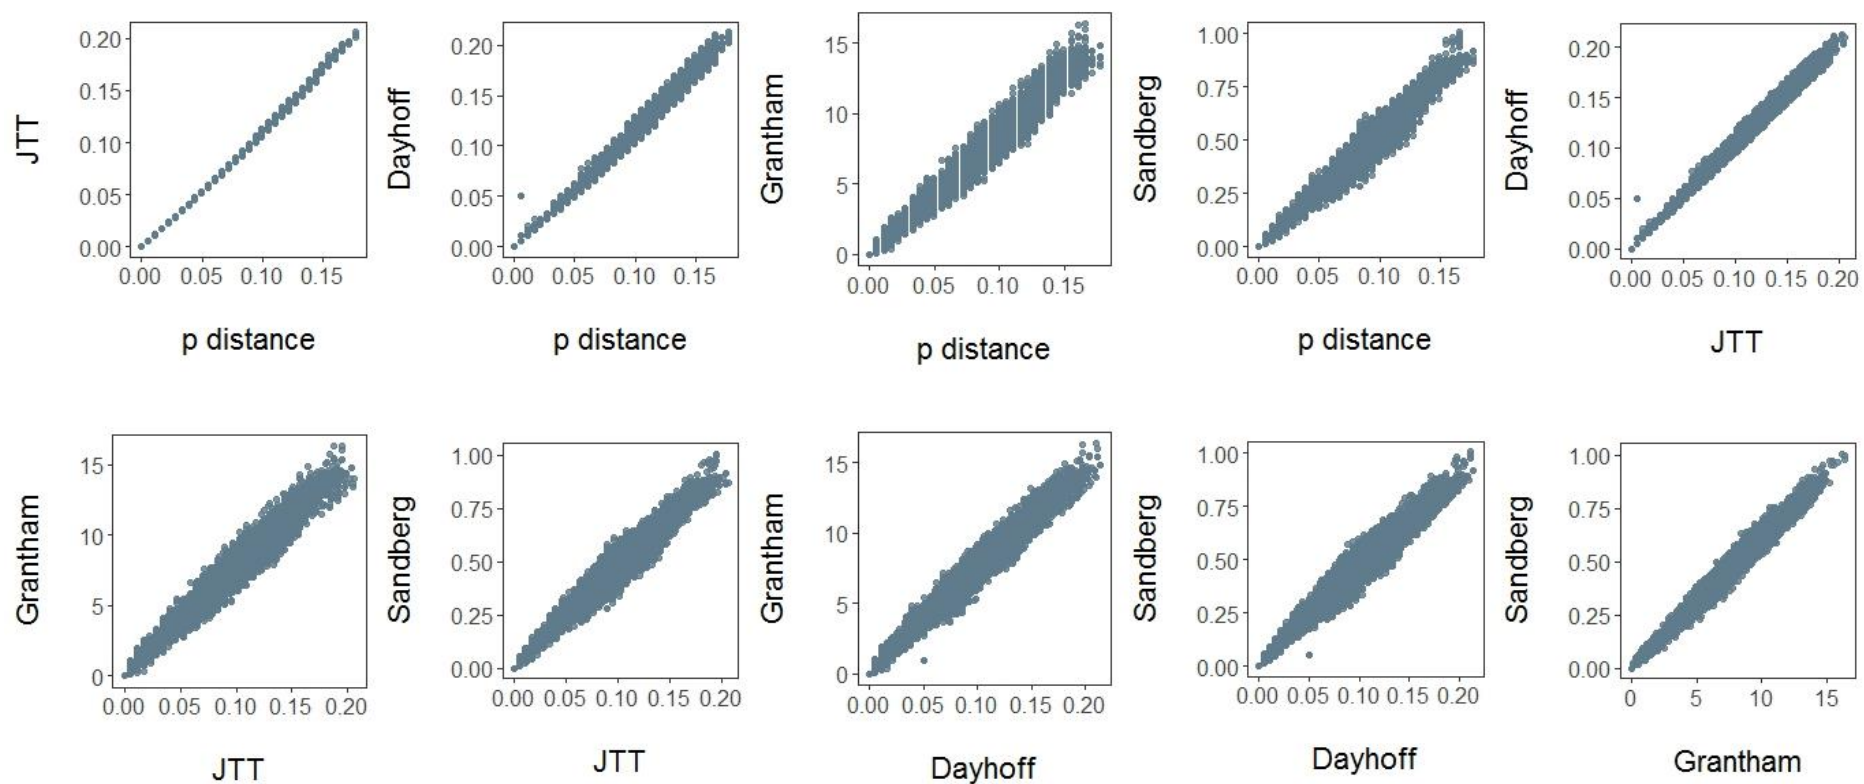



**Supplementary figure S7. Heterozygote advantage.** Total number of combined peptides bound by all possible homozygote and heterozygote genotypes at each locus (HLA-A, homozygotes n = 62, heterozygote n = 1891; HLA-B, homozygotes n = 123, heterozygote n = 7503; HLA-C, homozygotes n = 40, heterozygote n = 780; HLA-DRB1, homozygotes n = 73, heterozygote n = 2628; HLA-DQB1, homozygotes n = 21, heterozygote n = 210).

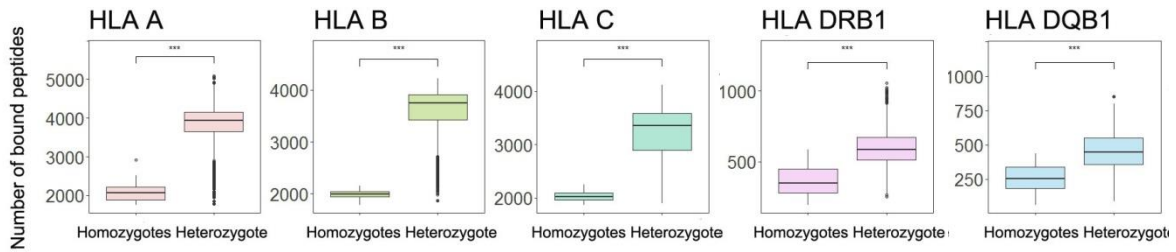

**Supplementary figure S8.** Correlation between pairwise genetic distances reported as Grantham distance (x-axes) and the number of overlapping peptides reported on a logarithmic scale (y-axes) counted for all possible pairs of common HLA alleles. Each dot represents an allele pair. Binding prediction analyses performed on the complete dataset of pathogen proteins (n=232).

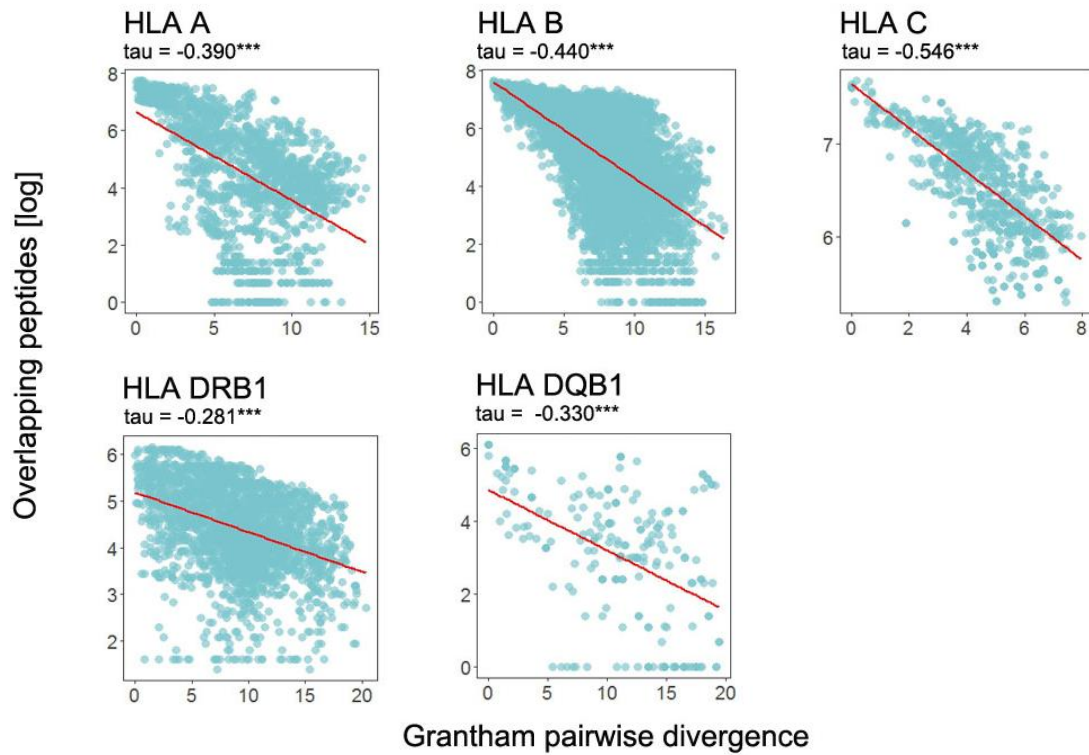

**Supplementary figure S9.** Correlation between pairwise genetic distances reported as Grantham distance (x-axes) and the number of bound peptide (y-axes) counted for all possible allele pairs. Each dot represents an allele pair. Binding prediction analyses performed on the complete dataset of pathogen proteins (n=232) and considering all common DRB1 alleles as well as Group A (N = 46) and Group B (N = 27) DRB1 alleles individually.

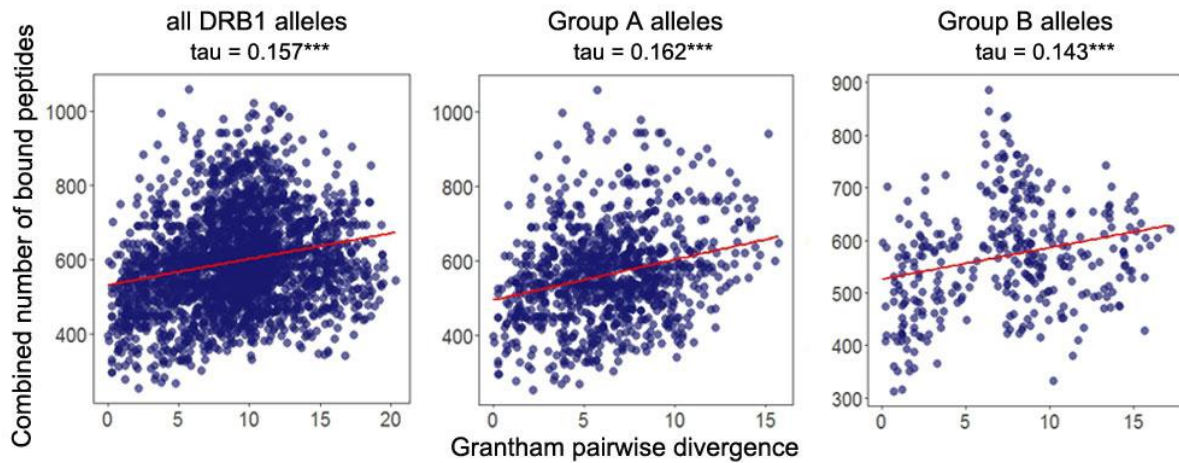

**Supplementary figure S10.** Distribution of differences in correlations values between intracellular and extracellular proteins (light blue histograms) obtained by permuting original proteins 1000 times between the three groups of pathogens and keeping the same number of proteins for each group as it occurred in the initial dataset. For each permuted dataset, the coefficient (Kendall's tau) of the correlation between allele divergence and number of bound peptides from intracellular proteins was subtracted from the coefficient of correlation with extracellular proteins (for MHC class I genes, expected to be more strongly associated with intracellular proteins) or vice versa (for MHC class II genes). Observed values (arrows) and 5% significance cut-off (red dotted lines) are also reported for the five HLA genes.

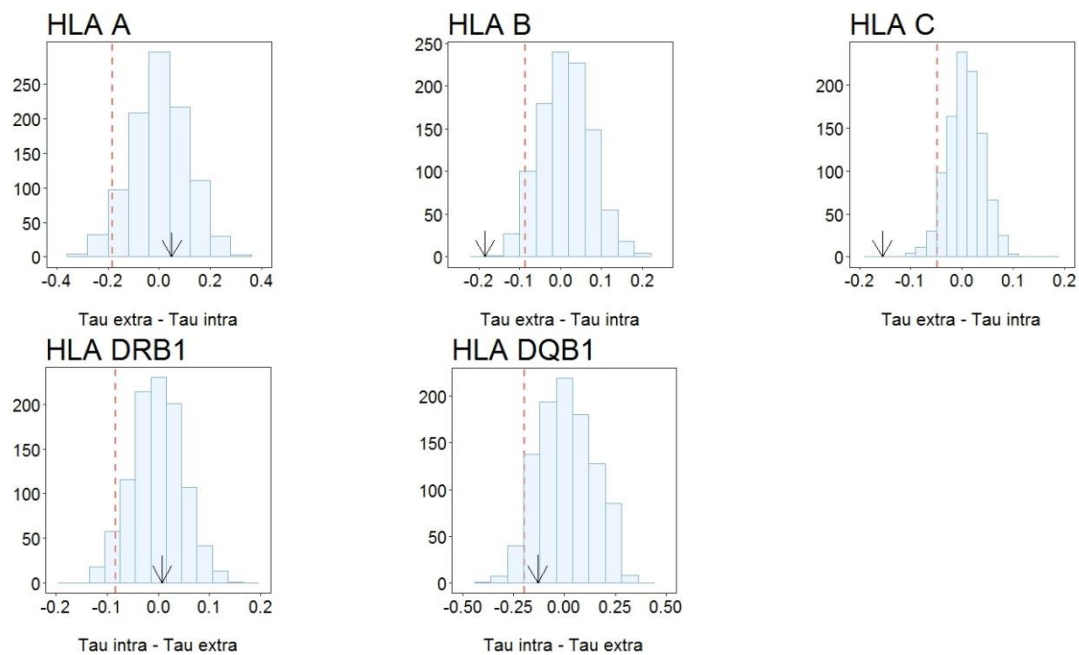

**Supplementary figure S11.** Mean amino-acid composition for each amino acid in two groups of pathogen proteins: extracellular (orange), intracellular (green) together with the statistical significance between each pair of groups. Bars sharing the same letter are not significantly different, while different letters indicate statistically significant differences between groups ( $p < 0.05$ ).

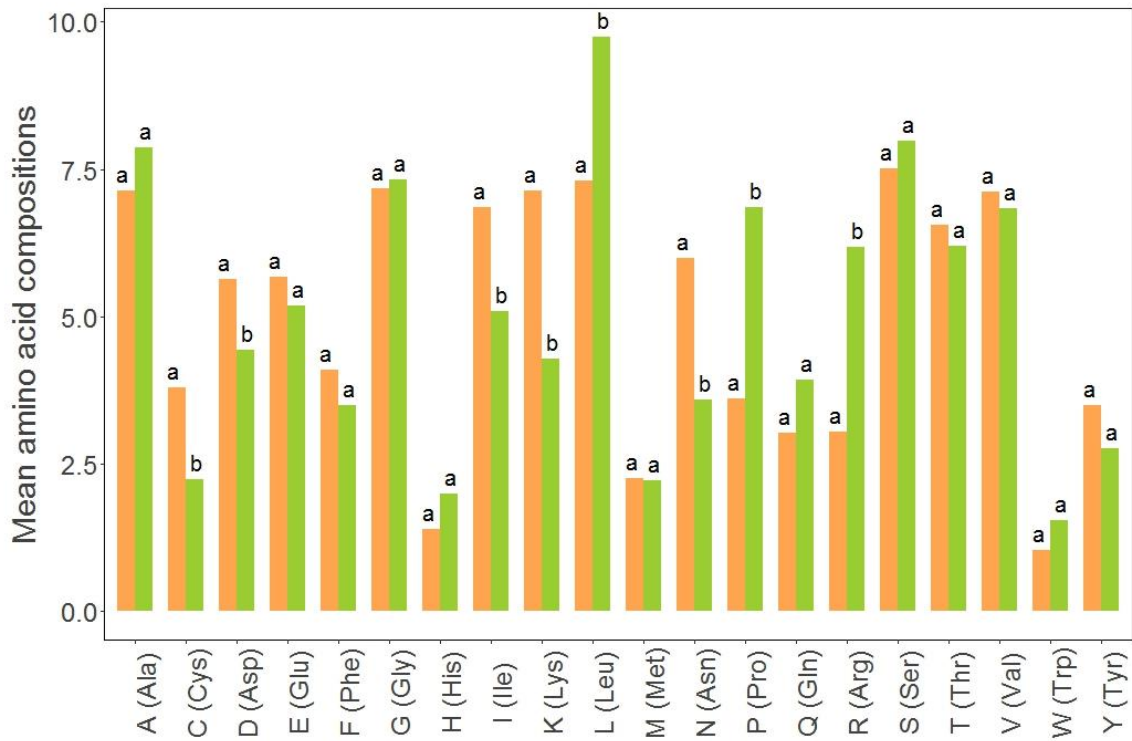

**Supplementary table S1.** HLA-A, -B, -C, -DRB1 and -DQB1 alleles listed as ‘common’ in the CWD catalogue (Mack et al. 2013) and used for binding prediction, sequence divergence and frequencies analysis. Two distinct phylogenetic groups of DRB1, denoted as group A and B, were also considered separately for the analysis.

| HLA-A (n = 63) |        |        | HLA-B (n = 123) |        |        |        |        | HLA-C (n = 40) |        | HLA-DRB1 (n = 73) |        |                  |        | HLA-DQB1 (n = 21) |
|----------------|--------|--------|-----------------|--------|--------|--------|--------|----------------|--------|-------------------|--------|------------------|--------|-------------------|
|                |        |        |                 |        |        |        |        |                |        | Group A (n = 46)  |        | Group B (n = 27) |        |                   |
| *01:01         | *11:02 | *34:02 | *07:02          | *15:21 | *35:14 | *40:05 | *51:02 | *01:02         | *12:04 | *03:01            | *13:01 | *01:01           | *16:04 | *02:01            |
| *01:02         | *11:04 | *34:05 | *07:04          | *15:24 | *35:16 | *40:06 | *51:05 | *02:02         | *14:02 | *03:02            | *13:02 | *01:02           | *16:07 | *02:02            |
| *01:03         | *23:01 | *36:01 | *07:05          | *15:25 | *35:17 | *40:08 | *51:06 | *02:10         | *14:03 | *08:01            | *13:03 | *01:03           |        | *02:03            |
| *02:01         | *24:02 | *43:01 | *07:06          | *15:30 | *35:19 | *40:16 | *51:07 | *03:02         | *15:02 | *08:02            | *13:04 | *04:01           |        | *03:01            |
| *02:02         | *24:03 | *66:01 | *07:10          | *15:32 | *35:20 | *40:27 | *51:08 | *03:03         | *15:04 | *08:03            | *13:05 | *04:02           |        | *03:02            |
| *02:03         | *24:07 | *66:02 | *08:01          | *15:34 | *35:21 | *41:01 | *51:09 | *03:04         | *15:05 | *08:04            | *13:07 | *04:03           |        | *03:03            |
| *02:04         | *24:10 | *68:01 | *13:01          | *15:35 | *35:23 | *41:02 | *52:01 | *03:05         | *15:16 | *08:06            | *13:10 | *04:04           |        | *03:04            |
| *02:05         | *24:17 | *68:02 | *13:02          | *15:39 | *35:41 | *41:03 | *53:01 | *03:06         | *15:09 | *08:07            | *13:12 | *04:05           |        | *03:05            |
| *02:06         | *24:20 | *68:03 | *14:01          | *18:01 | *35:43 | *42:01 | *54:01 | *04:01         | *16:01 | *08:10            | *13:14 | *04:06           |        | *03:09            |
| *02:07         | *24:25 | *68:05 | *14:02          | *18:02 | *37:01 | *42:02 | *55:01 | *04:03         | *16:02 | *08:11            | *13:20 | *04:07           |        | *03:19            |
| *02:08         | *24:33 | *69:01 | *14:03          | *18:03 | *38:01 | *44:02 | *55:02 | *04:04         | *16:04 | *10:01            | *14:01 | *04:08           |        | *04:01            |
| *02:09         | *25:01 | *74:01 | *15:01          | *27:02 | *38:02 | *44:03 | *56:01 | *04:07         | *17:01 | *11:01            | *14:02 | *04:09           |        | *04:02            |
| *02:10         | *26:01 | *74:03 | *15:02          | *27:03 | *39:01 | *44:04 | *57:01 | *05:01         | *17:03 | *11:02            | *14:03 | *04:10           |        | *05:01            |
| *02:11         | *26:03 |        | *15:03          | *27:04 | *39:02 | *44:05 | *57:02 | *06:02         | *18:01 | *11:03            | *14:04 | *04:11           |        | *05:02            |
| *02:14         | *26:08 |        | *15:07          | *27:05 | *39:03 | *44:10 | *57:03 | *07:01         | *18:02 | *11:04            | *14:05 | *04:17           |        | *05:03            |
| *02:17         | *29:01 |        | *15:08          | *27:06 | *39:05 | *44:27 | *58:01 | *07:02         |        | *11:06            | *14:06 | *04:38           |        | *06:01            |
| *02:20         | *29:02 |        | *15:09          | *27:07 | *39:06 | *45:01 | *58:02 | *07:04         |        | *11:09            | *14:07 | *07:01           |        | *06:02            |
| *02:22         | *30:01 |        | *15:10          | *27:08 | *39:08 | *46:01 | *59:01 | *07:06         |        | *11:10            | *14:17 | *09:01           |        | *06:03            |
| *02:24         | *30:02 |        | *15:11          | *35:01 | *39:10 | *47:01 | *67:01 | *07:18         |        | *11:11            | *14:18 | *15:01           |        | *06:04            |
| *02:30         | *30:04 |        | *15:12          | *35:02 | *39:11 | *48:01 | *73:01 | *08:01         |        | *11:12            | *14:24 | *15:02           |        | *06:08            |
| *02:60         | *31:01 |        | *15:13          | *35:03 | *39:12 | *48:03 | *78:01 | *08:02         |        | *11:15            | *14:54 | *15:03           |        | *06:09            |
| *03:01         | *32:01 |        | *15:15          | *35:04 | *39:15 | *49:01 | *81:01 | *08:03         |        | *11:17            |        | *15:04           |        |                   |
| *03:02         | *33:01 |        | *15:16          | *35:05 | *39:24 | *50:01 | *82:01 | *08:04         |        | *11:19            |        | *15:06           |        |                   |
| *03:05         | *33:03 |        | *15:17          | *35:08 | *40:01 | *50:02 |        | *12:02         |        | *12:01            |        | *16:01           |        |                   |
| *11:01         | *34:01 |        | *15:18          | *35:12 | *40:02 | *51:01 |        | *12:03         |        | *12:02            |        | *16:02           |        |                   |

**Supplementary table S2.** Classification table for pathogens categories and pathogen protein's accession numbers.

| Classification                | Pathogen                                | Protein name                                             | Accession number              |
|-------------------------------|-----------------------------------------|----------------------------------------------------------|-------------------------------|
| <b>Extracellular (n = 57)</b> | Clostridium tetani                      | tetanus toxin tetX (plasmid)                             | NP_783831                     |
|                               |                                         | tetanolysin O                                            | YP_008774065                  |
|                               |                                         | hemolysin                                                | NP_782184                     |
|                               |                                         | fibronectin-binding protein                              | NP_780878                     |
|                               |                                         | S-layer protein/N-acetylmuramoyl-L-alanine amidase       | NP_781182                     |
|                               | Vibrio cholerae                         | cholera enterotoxin subunit B                            | NP_231099                     |
|                               |                                         | cholera enterotoxin subunit A                            | NP_231100                     |
|                               |                                         | accessory cholera enterotoxin                            | NP_231102                     |
|                               |                                         | colonization factor                                      | NP_231104                     |
|                               | Entamoeba histolytica                   | calreticulin                                             | XP_655241                     |
|                               |                                         | membrane-bound O-acyltransferase (MBOAT) family protein  | EAL50306                      |
|                               |                                         | membrane transporter, putative                           | EAL50995                      |
|                               |                                         | adhesin 112 (EhADH112)                                   | XP_652992                     |
|                               |                                         | surface antigen ariel1                                   | AAC72364                      |
|                               |                                         | guanine nucleotide-binding protein subunit beta 2-like 1 | XP_657050                     |
|                               |                                         | enolase                                                  | XP_649161                     |
|                               |                                         | glyceraldehyde-phosphate dehydrogenase, partial          | AAA29100                      |
|                               |                                         | triosephosphate isomerase                                | XP_650725                     |
|                               |                                         | EF-hand calcium-binding domain containing protein        | XP_648032                     |
|                               |                                         | Giardia lamblia                                          | Seven transmembrane protein 1 |
|                               | High cysteine membrane protein Group 6  |                                                          | XP_001705852                  |
|                               | High cysteine membrane protein VSP-like |                                                          | XP_001705828                  |
|                               | VSP, putative                           |                                                          | XP_001703888                  |
|                               | VSP                                     |                                                          | XP_001705844                  |
|                               | VSP                                     |                                                          | XP_001705829                  |
|                               | VSP                                     |                                                          | XP_001705785                  |
| VSP                           | P_001705784                             |                                                          |                               |
| VSP                           | XP_001705783                            |                                                          |                               |

|                                |                                |                                                                     |              |
|--------------------------------|--------------------------------|---------------------------------------------------------------------|--------------|
|                                |                                | VSP                                                                 | XP_001703933 |
|                                |                                | VSP                                                                 | XP_001703925 |
|                                |                                | VSP                                                                 | XP_001703844 |
|                                |                                | VSP                                                                 | XP_001703931 |
|                                | Trichinella spiralis           | heat shock protein 70                                               | CAA73574     |
|                                |                                | cysteine protease ATG4B                                             | EFV52545     |
|                                |                                | 14-3-3 protein                                                      | ACV51809     |
|                                | Trichomonas vaginalis          | serine protease inhibitor Kazal-type 4                              | EFV53657     |
|                                |                                | P270 surface immunogen-like, partial                                | XP_001292151 |
|                                |                                | surface antigen BspA-like                                           | XP_001313891 |
|                                |                                | surface immunogen P270-related protein, partial                     | XP_001284871 |
|                                |                                | alpha-actinin                                                       | XP_001580136 |
|                                |                                | hypothetical protein                                                | XP_001582296 |
|                                |                                | Ser/Thr protein phosphatase                                         | XP_001299798 |
|                                |                                | Adenylate and Guanylate cyclase catalytic domain containing protein | XP_001584317 |
|                                |                                | Tetraspanin family protein                                          | XP_001327241 |
|                                |                                | polymorphic outer membrane protein                                  | XP_001325298 |
|                                |                                | polymorphic outer membrane protein                                  | XP_001303631 |
|                                |                                | Clan S-, family S54, Rhomboid-like serine peptidase                 | XP_001316801 |
|                                |                                | Tetraspanin family protein                                          | XP_001326883 |
|                                |                                | hypothetical protein                                                | XP_001301868 |
|                                | Schistosoma mansoni            | putative paramyosin (Allergen Blo t 11)                             | CCD74732     |
|                                |                                | putative paramyosin (Allergen Blo t 11)                             | CCD75328     |
|                                |                                | glyceraldehyde-3-phosphate dehydrogenase (phosphorylating)          | CCD75626     |
|                                |                                | glyceraldehyde-3-phosphate dehydrogenase (phosphorylating)          | CCD75625     |
|                                |                                | glyceraldehyde-3-phosphate dehydrogenase (phosphorylating)          | CCD75627     |
|                                |                                | glutathione S-transferase 26 kDa                                    | CCD80234     |
|                                |                                | putative fatty acid binding protein                                 | CCD77656     |
|                                |                                | putative fatty acid binding protein                                 | CCD77655     |
| <b>Intracellular (n = 100)</b> | Human immunodeficiency virus 1 | Gag-Pol                                                             | NP_057849    |
|                                |                                | Pr55(Gag)                                                           | NP_057850    |



|                   |                                                |              |
|-------------------|------------------------------------------------|--------------|
|                   | Vif                                            | NP_057851    |
|                   | Vpr                                            | NP_057852    |
|                   | Tat                                            | NP_057853    |
|                   | Rev                                            | NP_057854    |
|                   | Vpu                                            | NP_057855    |
|                   | Envelope surface glycoprotein gp160, precursor | NP_057856    |
|                   | Asp                                            | YP_009028572 |
|                   | Nef                                            | NP_057857    |
| Hepatitis B virus | Polymerase                                     | NP_647604    |
|                   | large envelope protein                         | YP_355333    |
|                   | middle envelope protein                        | YP_355334    |
|                   | small envelope protein                         | NP_647605    |
|                   | X protein                                      | NP_647606    |
|                   | pre-capsid protein                             | YP_355335    |
|                   | capsid protein                                 | NP_647607    |
| Measles virus     | nucleocapsid protein                           | NP_056918    |
|                   | phosphoprotein                                 | NP_056919    |
|                   | V protein                                      | YP_003873249 |
|                   | C protein                                      | NP_056920    |
|                   | matrix protein                                 | NP_056921    |
|                   | fusion protein                                 | NP_056922    |
|                   | hemagglutinin protein                          | NP_056923    |
|                   | large polymerase protein                       | NP_056924    |
| Mumps virus       | nucleocapsid protein                           | NP_054707    |
|                   | phosphoprotein                                 | NP_054708    |
|                   | V protein                                      | NP_054709    |
|                   | membrane protein                               | NP_054710    |
|                   | fusion protein                                 | NP_054711    |
|                   | small hydrophobic protein                      | NP_054712    |
|                   | hemagglutinin-neuraminidase                    | NP_054713    |
|                   | large protein                                  | NP_054714    |

|                                     |                                 |           |
|-------------------------------------|---------------------------------|-----------|
| Rabies virus                        | nucleoprotein N                 | NP_056793 |
|                                     | phosphoprotein M1               | NP_056794 |
|                                     | M2 protein                      | NP_056795 |
|                                     | transmembrane glycoprotein G    | NP_056796 |
|                                     | L protein                       | NP_056797 |
| Rubella virus                       | non-structural polyprotein      | NP_062883 |
|                                     | structural polyprotein          | NP_062884 |
| Hepatitis C virus                   | polyprotein                     | NP_671491 |
|                                     | protein F                       | NP_803170 |
| Human herpesvirus 4                 | early antigen protein D         | YP_401657 |
|                                     | envelope glycoprotein gp350     | YP_401667 |
|                                     | glycoprotein L precursor        | YP_401678 |
|                                     | glycoprotein M                  | YP_401685 |
|                                     | putative membrane antigen gp85  | YP_401694 |
|                                     | probable membrane glycoprotein  | YP_401706 |
|                                     | glycoprotein gp85 precursor     | YP_401700 |
|                                     | glycoprotein gp110 precursor    | YP_401713 |
|                                     | putative nmembrane antigen p140 | YP_401633 |
|                                     | membrane protein                | YP_401711 |
|                                     | putative membrane protein BLRF1 | YP_401665 |
|                                     | large tegument protein          | YP_401652 |
|                                     | EBNA-1 protein                  | YP_401677 |
|                                     | EBNA-2 nuclear protein          | YP_401644 |
|                                     | EBNA-LP protein                 | YP_401636 |
|                                     | EBNA3A nuclear protein          | YP_401669 |
|                                     | EBNA3C latent protein           | YP_401671 |
| EBNA-3B nuclear protein             | YP_401670                       |           |
| terminal protein LMP2A              | YP_401631                       |           |
| terminal protein LMP2B              | YP_401632                       |           |
| BCRF1 protein precursor             | YP_401634                       |           |
| hypothetical protein BCRF2, partial | YP_401635                       |           |

|                      |                                        |           |
|----------------------|----------------------------------------|-----------|
|                      | BMRF2 protein                          | YP_401658 |
|                      | BMLF1 protein                          | YP_401660 |
|                      | putative BLLF2 protein                 | YP_401668 |
|                      | putative BZLF2 protein                 | YP_401672 |
|                      | putative BARF0 protein, partial        | YP_401716 |
| Variola virus        | A-type inclusion body protein          | NP_042174 |
|                      | putative virulence factor              | NP_042060 |
|                      | 36 kDa major membrane protein          | NP_042073 |
|                      | palmytilated EEV membrane glycoprotein | NP_042081 |
|                      | IMV membrane protein                   | NP_042100 |
|                      | putative viral membrane protein        | NP_042129 |
|                      | IMV membrane protein                   | NP_042168 |
|                      | IEV and EEV membrane glycoprotein      | NP_042185 |
|                      | EEV membrane glycoprotein              | NP_042219 |
| Influenza A virus    | nucleocapsid protein                   | AJI80522  |
|                      | hemagglutinin                          | AJI80518  |
|                      | neuraminidase                          | AJI80521  |
| Treponema pallidum   | antigen                                | AAA75016  |
|                      | treponemal membrane protein A          | AAA27481  |
|                      | endoflagellar sheath protein           | AAA27477  |
|                      | 17 kDa lipoprotein                     | AAA27472  |
|                      | Tpp15                                  | AAC45732  |
| Mycobacterium leprae | FAP family protein                     | NP_302372 |
|                      | cytotoxin/hemolysin                    | NP_301968 |
|                      | p60-family protein                     | NP_301879 |
|                      | co-chaperonin GroES                    | NP_301372 |
|                      | putative secreted protein              | CAR70980  |
| Toxoplasma gondii    | hypothetical protein TGME49_279540     | EPT30382  |
|                      | dense granule protein GRA7             | EPT30138  |
|                      | aspartyl protease ASP1                 | EPT30276  |
|                      | rhopty protein ROP18                   | EPT29989  |

|                                     |                                   |                                                          |           |
|-------------------------------------|-----------------------------------|----------------------------------------------------------|-----------|
|                                     |                                   | MIC2-associated protein M2AP                             | EPT26499  |
|                                     |                                   | dense granule protein GRA2                               | EPT27242  |
|                                     |                                   | dense granule protein GRA6                               | EPT26403  |
|                                     |                                   | SAG-related sequence SRS39                               | EPT30357  |
|                                     |                                   | SAG-related sequence SRS35A                              | EPT29845  |
| <b>Intra-extracellular (n = 75)</b> | <i>Mycobacterium tuberculosis</i> | ESAT-6-like protein EsxB                                 | NP_218391 |
|                                     |                                   | ribonucleoside-diphosphate reductase subunit beta NrdF1  | YP_177853 |
|                                     |                                   | PPE family protein PPE42                                 | YP_177893 |
|                                     |                                   | NAD(P)H nitroreductase                                   | NP_216548 |
|                                     |                                   | ESX-1 secretion-associated protein EspI                  | NP_218393 |
|                                     |                                   | PPE family protein PPE68                                 | YP_178022 |
|                                     |                                   | ESAT-6 like protein EsxJ                                 | NP_215554 |
|                                     |                                   | diacylglycerol acyltransferase/mycolyltransferase Ag85A  | NP_218321 |
|                                     |                                   | heparin binding hemagglutinin HbhA                       | NP_214989 |
|                                     |                                   | permease                                                 | NP_216495 |
|                                     | <i>Streptococcus pneumoniae</i>   | surface protein pspA                                     | NP_357715 |
|                                     |                                   | choline binding protein A                                | P_359586  |
|                                     |                                   | N-acetylmuramoyl-L-alanine amidase                       | NP_359346 |
|                                     |                                   | endo-beta-N-acetylglucosaminidase                        | NP_358461 |
|                                     |                                   | 1,4-beta-N-acetylmuramidase                              | NP_359024 |
|                                     |                                   | Para-aminobenzoate synthetase                            | NP_358176 |
|                                     |                                   | neuraminidase A                                          | NP_359129 |
|                                     |                                   | manganese ABC transporter substrate-binding protein      | NP_359087 |
|                                     |                                   | cell wall-associated serine proteinase PrtA              | NP_358155 |
|                                     |                                   | zinc metalloprotease                                     | NP_358175 |
|                                     | <i>Yersinia pestis</i>            | F1 capsule antigen (plasmid)                             | NP_395430 |
|                                     |                                   | putative F1 capsule anchoring protein                    | NP_395429 |
|                                     |                                   | putative F1 operon positive regulatory protein (plasmid) | NP_395427 |
|                                     |                                   | secreted effector protein (plasmid)                      | NP_395165 |
|                                     |                                   | low calcium response protein G (plasmid)                 | NP_395166 |
|                                     |                                   | putative outer membrane virulence protein (plasmid)      | NP_395143 |

|                                             |                                                   |              |
|---------------------------------------------|---------------------------------------------------|--------------|
| Bordetella pertussis                        | pertussis toxin subunit 1                         | NP_882282    |
|                                             | pertussis toxin subunit 2                         | NP_882283    |
|                                             | pertussis toxin subunit 3                         | NP_882286    |
|                                             | pertussis toxin subunit 4                         | NP_882284    |
|                                             | pertussis toxin subunit 5                         | NP_882285    |
|                                             | serotype 2 fimbrial subunit                       | NP_879898    |
|                                             | serotype 3 fimbrial subunit                       | NP_880302    |
|                                             | filamentous hemagglutinin/adhesin                 | NP_880571    |
|                                             | pertactin autotransporter                         | NP_879839    |
|                                             | dermonecrotic toxin                               | NP_881965    |
| Corynebacterium diphtheriae                 | diphtheria toxin                                  | NP_938615    |
| Salmonella enterica                         | type III secretion protein                        | NP_456106    |
|                                             | type III secretion protein                        | NP_456107    |
|                                             | type III secretion protein                        | NP_456108    |
|                                             | type III secretion protein                        | NP_456109    |
|                                             | type III secretion protein                        | NP_456110    |
|                                             | type III secretion protein                        | NP_456114    |
|                                             | outer membrane secretory protein                  | NP_456134    |
|                                             | pathogenicity island 2 secreted effector protein  | NP_456135    |
|                                             | two-component sensor kinase                       | NP_456136    |
|                                             | Vi polysaccharide exporter protein                | NP_458730    |
|                                             | Vi polysaccharide exporter inner-membrane protein | NP_458731    |
|                                             | Vi polysaccharide exporter protein                | NP_458734    |
|                                             | Vi polysaccharide exporter ATP-binding protein    | NP_458732    |
|                                             | Vi polysaccharide exporter inner-membrane protein | NP_458733    |
|                                             | Vi polysaccharide biosynthesis protein            | NP_458738    |
|                                             | Vi polysaccharide biosynthesis epimerase          | NP_458739    |
|                                             | Vi polysaccharide biosynthesis protein            | NP_458741    |
| Vi polysaccharide biosynthesis protein TviE | NP_458735                                         |              |
| Plasmodium falciparum                       | rhopty-associated protein 1, RAP1                 | XP_001348275 |
|                                             | conserved Plasmodium protein, unknown function    | XP_001348247 |

|                                                                   |              |
|-------------------------------------------------------------------|--------------|
| reticulocyte binding protein 2 homolog A                          | XP_001350083 |
| reticulocyte binding protein 2, homolog b                         | XP_002809051 |
| plasmodium falciparum gamete antigen 27/25                        | XP_001349749 |
| Thrombospondin-related anonymous protein, TRAP                    | XP_001350088 |
| erythrocyte binding antigen-140                                   | XP_001349859 |
| CelTOS, putative                                                  | XP_001350569 |
| erythrocyte membrane protein 1, PfEMP1                            | XP_001350410 |
| MAEBL, putative (merozoite adhesive erythrocytic binding protein) | XP_001348153 |
| apical membrane antigen 1, AMA1                                   | XP_001348015 |
| circumsporozoite-related antigen                                  | XP_001347895 |
| merozoite surface protein                                         | XP_001347636 |
| merozoite surface protein 6                                       | XP_001347630 |
| merozoite surface protein 3                                       | XP_001347629 |
| cytoadherence linked asexual protein 9(CLAG9)                     | XP_001352222 |
| merozoite surface protein 1 precursor                             | XP_001352170 |
| heat shock 70 kDa protein                                         | XP_001349336 |
| reticulocyte-binding protein homologue 1                          | XP_002808637 |
| merozoite surface protein 2 precursor                             | XP_001349578 |

**Supplementary table S3.** Correlation values between pairwise parameters of allele divergence.

|                       | HLA-A |                  | HLA-B |                  | HLA-C |                  | HLA-DRB1 |                  | HLA-DQB1 |                  |
|-----------------------|-------|------------------|-------|------------------|-------|------------------|----------|------------------|----------|------------------|
|                       | tau   | p <sub>adj</sub> | tau   | p <sub>adj</sub> | tau   | p <sub>adj</sub> | tau      | p <sub>adj</sub> | tau      | p <sub>adj</sub> |
| p-distance ~ jtt      | 0.977 | < 0.001          | 0.974 | < 0.001          | 0.952 | < 0.001          | 0.962    | < 0.001          | 0.975    | < 0.001          |
| p-distance ~ dayhoff  | 0.94  | < 0.001          | 0.933 | < 0.001          | 0.931 | < 0.001          | 0.922    | < 0.001          | 0.956    | < 0.001          |
| p-distance ~ grantham | 0.859 | < 0.001          | 0.855 | < 0.001          | 0.744 | < 0.001          | 0.845    | < 0.001          | 0.929    | < 0.001          |
| p-distance ~ sandberg | 0.886 | < 0.001          | 0.847 | < 0.001          | 0.823 | < 0.001          | 0.879    | < 0.001          | 0.928    | < 0.001          |
| jtt ~ dayhoff         | 0.931 | < 0.001          | 0.925 | < 0.001          | 0.914 | < 0.001          | 0.923    | < 0.001          | 0.957    | < 0.001          |
| jtt ~ grantham        | 0.843 | < 0.001          | 0.839 | < 0.001          | 0.702 | < 0.001          | 0.824    | < 0.001          | 0.914    | < 0.001          |
| jtt ~ sandberg        | 0.875 | < 0.001          | 0.832 | < 0.001          | 0.785 | < 0.001          | 0.855    | < 0.001          | 0.914    | < 0.001          |
| dayhoff ~ grantham    | 0.875 | < 0.001          | 0.85  | < 0.001          | 0.724 | < 0.001          | 0.844    | < 0.001          | 0.909    | < 0.001          |
| dayhoff ~ sandberg    | 0.896 | < 0.001          | 0.828 | < 0.001          | 0.79  | < 0.001          | 0.876    | < 0.001          | 0.915    | < 0.001          |
| grantham ~ sandberg   | 0.923 | < 0.001          | 0.884 | < 0.001          | 0.808 | < 0.001          | 0.904    | < 0.001          | 0.947    | < 0.001          |

tau: Kendall's tau coefficient; p<sub>adj</sub>: p-value after Bonferroni-correction across multiple alleles tested at each locus and number of loci

**Supplementary table S4.** Correlation values between combined number of bound peptide and genetic distance between all possible alleles pairs across the five key classical MHC genes. Genetic distances determined using five different pairwise parameters of allele divergence: p-distance, DayHoff and JTT, Grantham and Sandberg. Binding prediction was performed on the complete dataset of pathogen proteins (n=232) as well as considering proteins separately within three groups of pathogens: extracellular (n = 57), intracellular (n = 100) and intra-extracellular (n = 75).

| Pathogen groups | Parameters | HLA-A |                  | HLA-B |                  | HLA-C |                  | HLA-DRB1 |                  | HLA-DQB1 |                  |
|-----------------|------------|-------|------------------|-------|------------------|-------|------------------|----------|------------------|----------|------------------|
|                 |            | tau   | p <sub>adj</sub> | tau   | p <sub>adj</sub> | tau   | p <sub>adj</sub> | tau      | p <sub>adj</sub> | tau      | p <sub>adj</sub> |
| Total           | P-distance | 0.420 | < 0.001          | 0.375 | < 0.001          | 0.412 | < 0.001          | 0.174    | < 0.001          | 0.223    | < 0.001          |
|                 | Dayhoff    | 0.387 | < 0.001          | 0.364 | < 0.001          | 0.415 | < 0.001          | 0.174    | < 0.001          | 0.226    | < 0.001          |
|                 | Jtt        | 0.410 | < 0.001          | 0.366 | < 0.001          | 0.377 | < 0.001          | 0.179    | < 0.001          | 0.215    | < 0.001          |
|                 | Grantham   | 0.361 | < 0.001          | 0.397 | < 0.001          | 0.507 | < 0.001          | 0.157    | < 0.001          | 0.210    | 0.001            |
|                 | Sandberg   | 0.380 | < 0.001          | 0.361 | < 0.001          | 0.438 | < 0.001          | 0.165    | < 0.001          | 0.206    | 0.001            |
| Extracellular   | P-distance | 0.394 | < 0.001          | 0.148 | < 0.001          | 0.333 | < 0.001          | 0.136    | < 0.001          | 0.316    | < 0.001          |
|                 | Dayhoff    | 0.365 | < 0.001          | 0.127 | < 0.001          | 0.325 | < 0.001          | 0.149    | < 0.001          | 0.321    | < 0.001          |
|                 | Jtt        | 0.383 | < 0.001          | 0.143 | < 0.001          | 0.300 | < 0.001          | 0.145    | < 0.001          | 0.310    | < 0.001          |
|                 | Grantham   | 0.345 | < 0.001          | 0.192 | < 0.001          | 0.392 | < 0.001          | 0.130    | < 0.001          | 0.303    | < 0.001          |
|                 | Sandberg   | 0.355 | < 0.001          | 0.194 | < 0.001          | 0.362 | < 0.001          | 0.135    | < 0.001          | 0.299    | < 0.001          |
| Extra-Intra     | P-distance | 0.413 | < 0.001          | 0.267 | < 0.001          | 0.384 | < 0.001          | 0.195    | < 0.001          | 0.223    | 0.010            |
|                 | Dayhoff    | 0.375 | < 0.001          | 0.246 | < 0.001          | 0.378 | < 0.001          | 0.196    | < 0.001          | 0.229    | 0.016            |
|                 | Jtt        | 0.402 | < 0.001          | 0.255 | < 0.001          | 0.352 | < 0.001          | 0.201    | < 0.001          | 0.217    | 0.007            |
|                 | Grantham   | 0.351 | < 0.001          | 0.289 | < 0.001          | 0.475 | < 0.001          | 0.166    | < 0.001          | 0.210    | 0.024            |
|                 | Sandberg   | 0.370 | < 0.001          | 0.276 | < 0.001          | 0.415 | < 0.001          | 0.175    | < 0.001          | 0.206    | 0.029            |
| Intracellular   | P-distance | 0.325 | < 0.001          | 0.387 | < 0.001          | 0.439 | < 0.001          | 0.149    | < 0.001          | 0.187    | < 0.001          |
|                 | Dayhoff    | 0.314 | < 0.001          | 0.397 | < 0.001          | 0.450 | < 0.001          | 0.140    | < 0.001          | 0.186    | < 0.001          |
|                 | Jtt        | 0.321 | < 0.001          | 0.383 | < 0.001          | 0.405 | < 0.001          | 0.150    | < 0.001          | 0.177    | < 0.001          |
|                 | Grantham   | 0.293 | < 0.001          | 0.377 | < 0.001          | 0.544 | < 0.001          | 0.137    | < 0.001          | 0.172    | 0.001            |
|                 | Sandberg   | 0.314 | < 0.001          | 0.326 | < 0.001          | 0.454 | < 0.001          | 0.143    | < 0.001          | 0.170    | 0.001            |

tau: Kendall's tau coefficient; p<sub>adj</sub>: p-value after Bonferroni-correction across multiple alleles tested at each locus and number of loci



**Supplementary table S5.** Correlation values between combined number of bound peptide and Grantham genetic distance between all possible alleles pairs across the two class II loci (HLA-DRB1 and HLA-DQB1). Binding prediction analysis of all possible 15mer pathogen-derived peptides were performed considering the complete dataset of pathogen proteins (n=232) as well as considering proteins separately within three groups of pathogens: extracellular (n = 57), intracellular (n = 100) and intra-extracellular (n = 75).

| Pathogen groups | HLA-DRB1 |                  | HLA-DQB1 |                  |
|-----------------|----------|------------------|----------|------------------|
|                 | tau      | p <sub>adj</sub> | tau      | p <sub>adj</sub> |
| Total           | 0.355    | < 0.001          | 0.135    | 0.401            |
| Extracellular   | 0.271    | < 0.001          | 0.367    | < 0.001          |
| Extra-Intra     | 0.332    | < 0.001          | 0.086    | 6.994            |
| Intracellular   | 0.34     | < 0.001          | 0.112    | 1.720            |

tau: Kendall's tau coefficient; p<sub>adj</sub>: p-value after Bonferroni-correction across multiple alleles tested at each locus and number of loci

**Supplementary table S6.** Correlation values between combined number of bound peptide and Grantham genetic distance between all possible alleles pairs across the five key classical MHC genes. Binding prediction analysis were performed using the established binding threshold (%rank of 0.5) which includes only strong binders, considering the complete dataset of pathogen proteins (n=232) as well as considering proteins separately within three groups of pathogens: extracellular (n = 57), intracellular (n = 100) and intra-extracellular (n = 75).

| Pathogen groups | HLA-A |                  | HLA-B |                  | HLA-C |                  | HLA-DRB1 |                  | HLA-DQB1 |                  |
|-----------------|-------|------------------|-------|------------------|-------|------------------|----------|------------------|----------|------------------|
|                 | tau   | p <sub>adj</sub> | tau   | p <sub>adj</sub> | tau   | p <sub>adj</sub> | tau      | p <sub>adj</sub> | tau      | p <sub>adj</sub> |
| Total           | 0.132 | < 0.001          | 0.225 | < 0.001          | 0.400 | < 0.001          | 0.086    | < 0.001          | 0.182    | 0.011            |
| Extracellular   | 0.154 | < 0.001          | 0.088 | < 0.001          | 0.267 | < 0.001          | 0.082    | < 0.001          | 0.241    | < 0.001          |
| Extra-Intra     | 0.160 | < 0.001          | 0.130 | < 0.001          | 0.397 | < 0.001          | 0.076    | < 0.001          | 0.209    | 0.001            |
| Intracellular   | 0.091 | < 0.001          | 0.217 | < 0.001          | 0.395 | < 0.001          | 0.075    | < 0.001          | 0.146    | 0.206            |

tau: Kendall's tau coefficient; p<sub>adj</sub>: p-value after Bonferroni-correction across multiple alleles tested at each locus and number of loci

**Supplementary table S7.** Correlations values between combined number of bound peptide and Grantham genetic distance between all possible allele pairs at each of the five key classical MHC genes, reported for four different sets of artificial proteins.

| Loci     | Pathogen groups | Original proteins |                  | AAC within proteins |                  | AAC within pathogen groups |                  | AAC across all pathogens |                  | AAC UniProtKB/Swiss-Prot |                  |
|----------|-----------------|-------------------|------------------|---------------------|------------------|----------------------------|------------------|--------------------------|------------------|--------------------------|------------------|
|          |                 | tau               | p <sub>adj</sub> | tau                 | p <sub>adj</sub> | tau                        | p <sub>adj</sub> | tau                      | p <sub>adj</sub> | tau                      | p <sub>adj</sub> |
| HLA-A    | Extracellular   | 0.345             | < 0.001          | 0.317               | < 0.001          | 0.197                      | < 0.001          | 0.153                    | < 0.001          | 0.096                    | < 0.001          |
|          | Extra-Intra     | 0.351             | < 0.001          | 0.225               | < 0.001          | 0.141                      | < 0.001          | 0.125                    | < 0.001          | 0.106                    | < 0.001          |
|          | Intracellular   | 0.293             | < 0.001          | 0.222               | < 0.001          | 0.139                      | < 0.001          | 0.163                    | < 0.001          | 0.126                    | < 0.001          |
| HLA-B    | Extracellular   | 0.192             | < 0.001          | 0.237               | < 0.001          | 0.196                      | < 0.001          | 0.314                    | < 0.001          | 0.309                    | < 0.001          |
|          | Extra-Intra     | 0.289             | < 0.001          | 0.252               | < 0.001          | 0.235                      | < 0.001          | 0.330                    | < 0.001          | 0.343                    | < 0.001          |
|          | Intracellular   | 0.377             | < 0.001          | 0.375               | < 0.001          | 0.366                      | < 0.001          | 0.333                    | < 0.001          | 0.356                    | < 0.001          |
| HLA-C    | Extracellular   | 0.392             | < 0.001          | 0.361               | < 0.001          | 0.317                      | < 0.001          | 0.495                    | < 0.001          | 0.450                    | < 0.001          |
|          | Extra-Intra     | 0.475             | < 0.001          | 0.465               | < 0.001          | 0.436                      | < 0.001          | 0.495                    | < 0.001          | 0.499                    | < 0.001          |
|          | Intracellular   | 0.544             | < 0.001          | 0.531               | < 0.001          | 0.543                      | < 0.001          | 0.491                    | < 0.001          | 0.493                    | < 0.001          |
| HLA-DRB1 | Extracellular   | 0.130             | < 0.001          | 0.151               | < 0.001          | 0.136                      | < 0.001          | 0.177                    | < 0.001          | 0.131                    | < 0.001          |
|          | Extra-Intra     | 0.166             | < 0.001          | 0.144               | < 0.001          | 0.129                      | < 0.001          | 0.169                    | < 0.001          | 0.198                    | < 0.001          |
|          | Intracellular   | 0.137             | < 0.001          | 0.249               | < 0.001          | 0.186                      | < 0.001          | 0.168                    | < 0.001          | 0.165                    | < 0.001          |
| HLA-DQB1 | Extracellular   | 0.303             | < 0.001          | 0.407               | < 0.001          | 0.414                      | < 0.001          | 0.367                    | < 0.001          | 0.420                    | < 0.001          |
|          | Extra-Intra     | 0.210             | 0.024            | 0.439               | < 0.001          | 0.435                      | < 0.001          | 0.418                    | < 0.001          | 0.419                    | < 0.001          |
|          | Intracellular   | 0.172             | 0.001            | 0.349               | < 0.001          | 0.383                      | < 0.001          | 0.399                    | < 0.001          | 0.438                    | < 0.001          |

tau: Kendall's tau coefficient; p<sub>adj</sub>: p-value after Bonferroni-correction across multiple alleles tested at each locus and number of loci

Peptide binding prediction was performed for different sets of artificial proteins in order to test for a potential bias by certain HLA genes towards specific pathogen groups and estimate the effect of group-specific amino acid composition (AAC). Artificial proteins were created in four different ways: by randomly shuffling the amino acids within each pathogen protein (AAC within proteins), by maintaining the amino acid frequencies as they occur within each group of pathogen proteins (AAC within pathogen groups), by considering amino acid frequencies as they occur in the whole dataset of pathogenic proteins (AAC across all pathogens), or by using the amino acid frequencies computed from UniProtKB/Swiss-Prot data bank (AAC UniProtKB/Swiss-Prot).

**Supplementary table S8.** Comparison of average amino acid composition between the two groups of pathogen proteins (extracellular and intracellular) performed using one-way analysis of variance. Mean amino-acid composition and standard deviation within the two groups of pathogen proteins are reported for each amino acid, together with the statistical significance between each pair of groups.

|         | <b>Extracellular</b> | <b>Intracellular</b> | <b>p<sub>adj</sub></b> |
|---------|----------------------|----------------------|------------------------|
| A (Ala) | 7.14 (2.89)          | 7.86 (3.35)          | 3.540                  |
| R (Arg) | 3.04 (1.71)          | 6.17 (3.01)          | < 0.001                |
| N (Asn) | 6 (2.78)             | 3.58 (2.07)          | < 0.001                |
| D (Asp) | 5.63 (1.69)          | 4.44 (2)             | 0.004                  |
| C (Cys) | 3.79 (4.31)          | 2.23 (1.72)          | 0.032                  |
| Q (Gln) | 3.02 (1.8)           | 3.92 (2.19)          | 0.182                  |
| E (Glu) | 5.67 (2.86)          | 5.19 (2.53)          | 5.600                  |
| G (Gly) | 7.18 (3.56)          | 7.32 (4.21)          | 16.600                 |
| H (His) | 1.39 (1.08)          | 1.99 (1.33)          | 0.080                  |
| I (Ile) | 6.86 (3.22)          | 5.09 (2.91)          | 0.011                  |
| L (Leu) | 7.3 (3.01)           | 9.74 (3.65)          | 0.001                  |
| K (Lys) | 7.14 (2.46)          | 4.29 (2.59)          | < 0.001                |
| M (Met) | 2.25 (1.62)          | 2.22 (1.19)          | 18.200                 |
| F (Phe) | 4.09 (1.93)          | 3.5 (1.87)           | 1.260                  |
| P (Pro) | 3.6 (1.7)            | 6.85 (4.55)          | < 0.001                |
| S (Ser) | 7.51 (3.01)          | 7.98 (2.28)          | 5.400                  |
| T (Thr) | 6.56 (2.57)          | 6.2 (2.88)           | 8.600                  |
| W (Trp) | 1.04 (1.03)          | 1.55 (1.24)          | 0.178                  |
| Y (Tyr) | 3.49 (1.85)          | 2.76 (1.46)          | 0.140                  |
| V (Val) | 7.12 (2.83)          | 6.84 (2.33)          | 10.000                 |

p<sub>adj</sub>: p-value after Bonferroni-correction across the number of amino acids tested

**Supplementary table S9.** Correlations values between the average Grantham pairwise divergence to the most common alleles and the allele frequency in different European populations for four classical HLA loci. USA NMDP: HLA allele frequencies information provided from the National Marrow Donor Program.

| population                  | HLA-A |       |                  | HLA-B |         |                  | HLA-C |       |                  | HLA-DRB1 |       |                  |
|-----------------------------|-------|-------|------------------|-------|---------|------------------|-------|-------|------------------|----------|-------|------------------|
|                             | tau   | P     | p <sub>adj</sub> | tau   | P       | p <sub>adj</sub> | tau   | P     | p <sub>adj</sub> | tau      | P     | p <sub>adj</sub> |
| USA NMDP European Caucasian | 0.110 | 0.255 | 0.766            | 0.241 | < 0.001 | 0.001            | 0.235 | 0.119 | 0.356            | 0.194    | 0.024 | 0.072            |
| German                      | 0.150 | 0.120 | 0.356            | 0.173 | 0.012   | 0.036            | 0.280 | 0.018 | 0.054            | 0.254    | 0.004 | 0.012            |
| Poland                      | 0.061 | 0.573 | 1.722            | 0.103 | 0.189   | 0.564            | 0.264 | 0.038 | 0.113            | 0.201    | 0.035 | 0.104            |

tau: Kendall's tau coefficient; P: p-value from Kendall correlation; p<sub>adj</sub>: p-value after Bonferroni-correction across multiple tested populations
